# Supplementary material for: Synthetic mapping of XCO 2 retrieval performance from shortwave infrared measurements: impact of spectral resolution, signal-to-noise ratio and spectral band selection
Source: Copernicus journal article supplement (doi:10.5194/amt-2023-233), 2023-11-14
Supplement: Supplementary file 1 [file amt-2023-233-supplement.pdf]

*Supplement of*

**Synthetic mapping of XCO<sub>2</sub> retrieval performance from shortwave infrared measurements: impact of spectral resolution, signal-to-noise ratio and spectral band selection**

5

**Matthieu Dogniaux et al.**

*Correspondence to:* M.Dogniaux@sron.nl

## **1 Overview**

- 10 This supplement provides the exact list of resolving power values (Table S1) and average albedo values for the three surface models considered in this work (Table S2). It gives results for all observational situations (Figures S2 – S7 and S9 – S14), different a posteriori correlation matrices (Figures S15 – S18), and a version of Fig. 5 in linear scale for the horizontal axis (S9).

## **2 Contents of this file**

- 15 Table S1 and Figures S1 to S18.

|       |       |       |       |       |       |       |       |       |
|-------|-------|-------|-------|-------|-------|-------|-------|-------|
| 200   | 289   | 378   | 467   | 556   | 644   | 733   | 822   | 911   |
| 1000  | 2000  | 3000  | 4000  | 5000  | 6000  | 7000  | 8000  | 9000  |
| 10000 | 12222 | 14444 | 16667 | 18889 | 21111 | 23333 | 25556 | 27778 |
| 30000 |       |       |       |       |       |       |       |       |

Table S1. Exact list of resolving power values used in this work.

|                                    | <b>SOL</b> | <b>VEG</b> | <b>DES</b> |
|------------------------------------|------------|------------|------------|
| <b>O<sub>2</sub> 0.76 μm band</b>  | 0.10       | 0.45       | 0.50       |
| <b>CO<sub>2</sub> 1.6 μm band</b>  | 0.22       | 0.29       | 0.57       |
| <b>CO<sub>2</sub> 2.05 μm band</b> | 0.18       | 0.09       | 0.58       |
| <b>O<sub>2</sub> 1.27 μm band</b>  | 0.21       | 0.47       | 0.57       |

Table S2. Albedo values for the three surface models used in this work, averaged over MicroCarb bands.

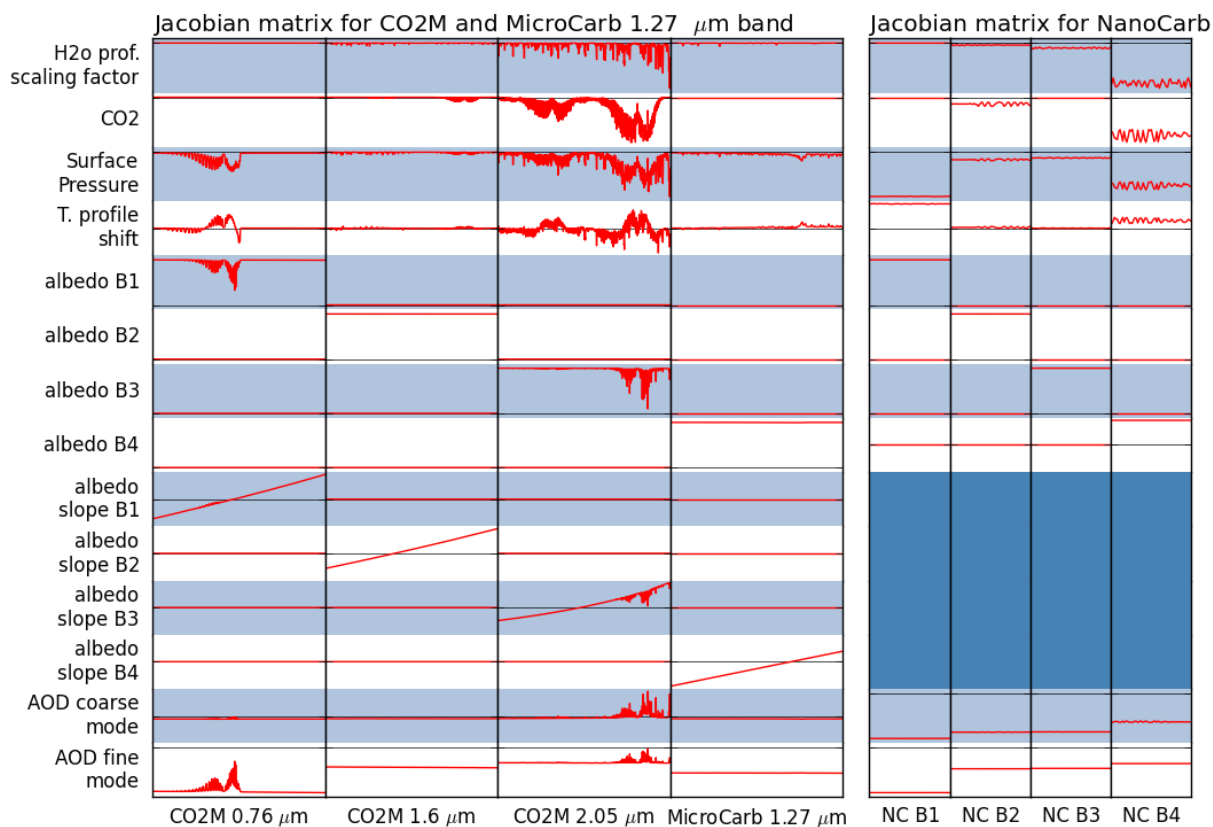

25 Figure S1. Relative measurement sensitivities at  $\lambda/\Delta\lambda = 15000$  for all state vector variables, for all CO<sub>2</sub>M spectral bands and for MicroCarb 1.27  $\mu\text{m}$  O<sub>2</sub>-sensitive band (left), and relative NanoCarb measurement sensitivities for all NanoCarb bands (right), for a vegetation-like albedo and a Solar Zenith Angle of 50°. Black horizontal line show the zero level and the vertical scale are arbitrary.

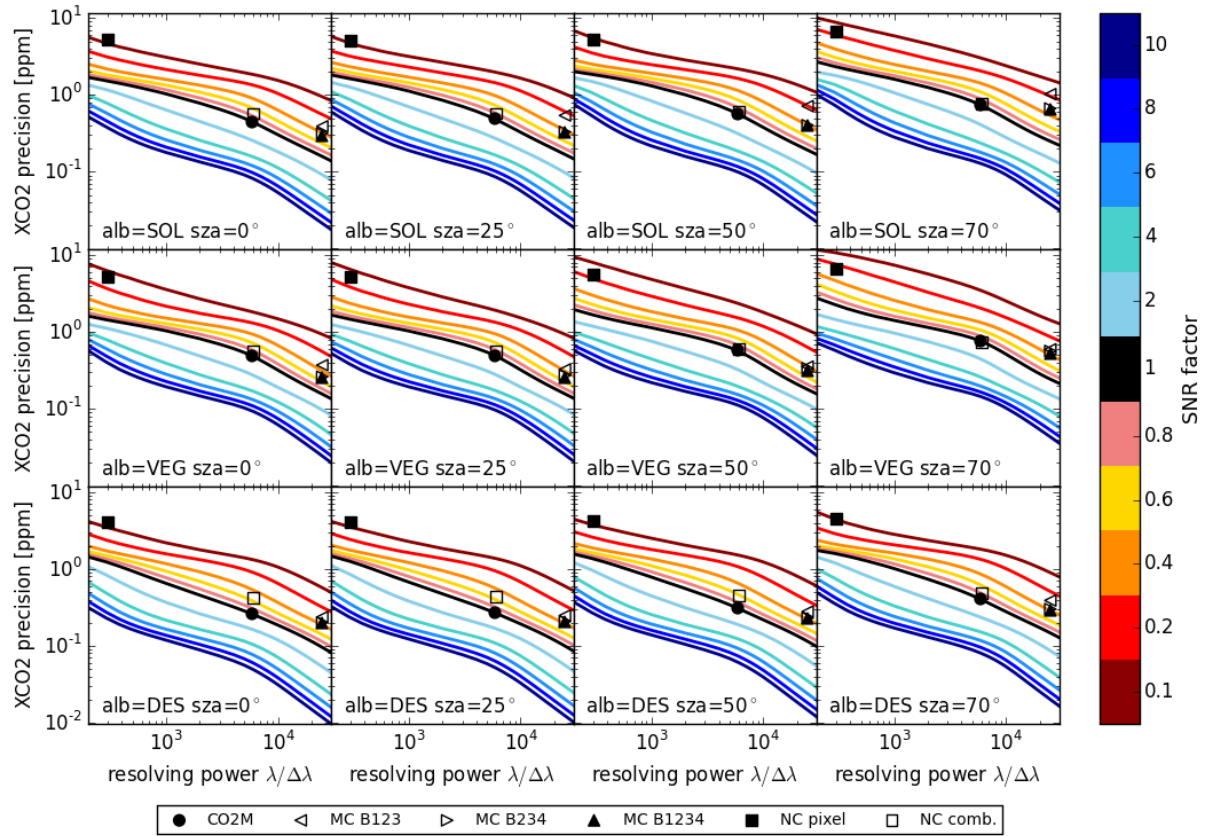

30 Figure S2.  $X_{CO_2}$  precision, or random error, for the fictitious CVAR instrument for resolving power  $\lambda/\Delta\lambda$  evolving from 200 to 30000 (horizontal axis), and for SNR evolving from 0.1 to 10 times CO<sub>2</sub>M reference SNR (colour scale), for SOL, VEG and DES albedo models (rows), and SZA values ranging from 0° to 70° (columns). Symbols give the same quantities for NanoCarb (NC, squares), MicroCarb (MC, triangles) and CO<sub>2</sub>M (circle).

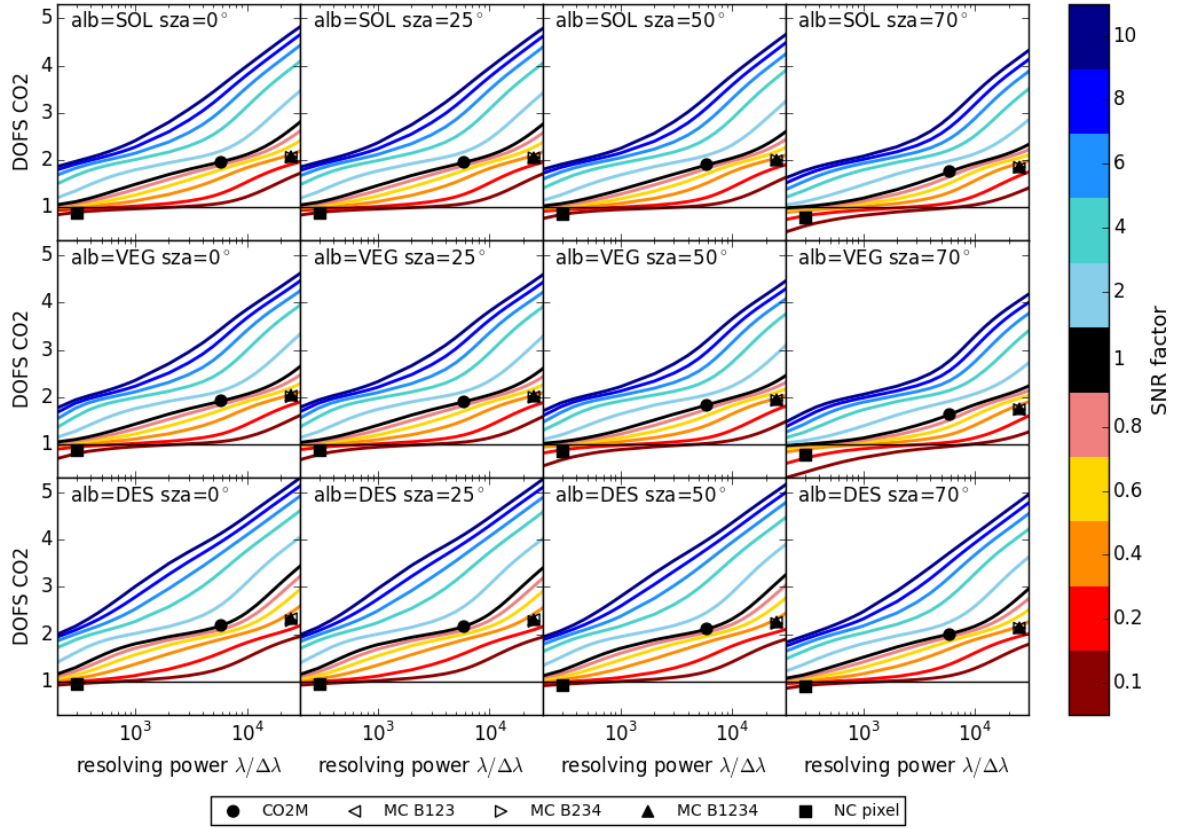

35

Figure S3. CO<sub>2</sub> degrees of freedom for the fictitious CVAR instrument for resolving power  $\lambda/\Delta\lambda$  evolving from 200 to 30000 (horizontal axis), and for SNR evolving from 0.1 to 10 times CO<sub>2</sub>M reference SNR (colour scale), for SOL, VEG and DES albedo models (rows), and SZA values ranging from 0° to 70° (columns). Symbols give the same quantities for NanoCarb (NC, squares), MicroCarb (MC, triangles) and CO<sub>2</sub>M (circle).

40

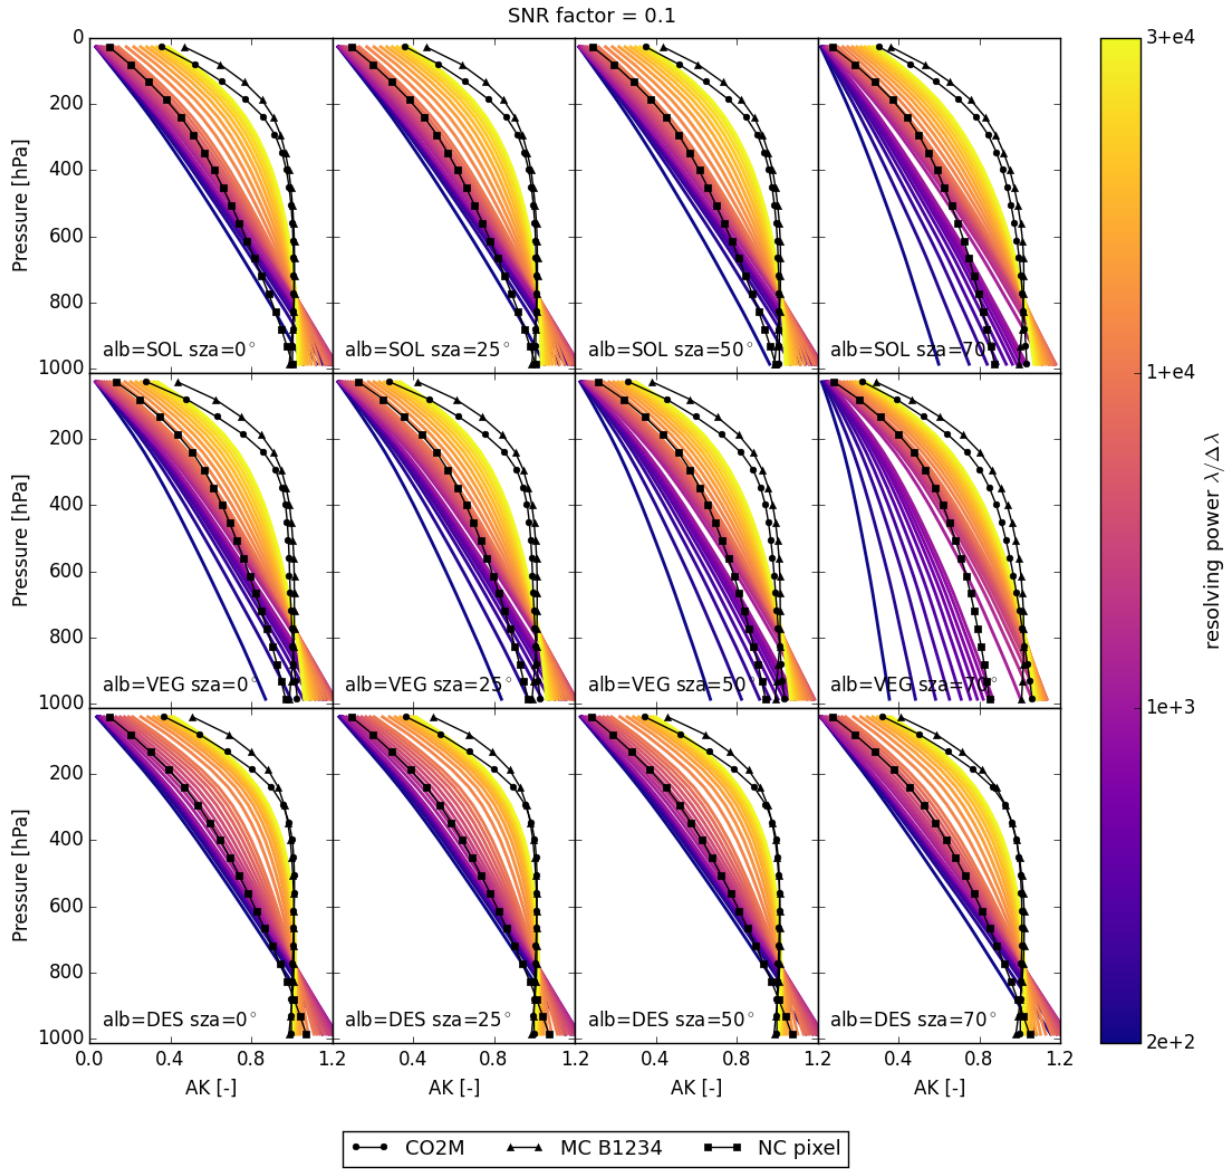

Figure S4. Vertical sensitivities (AKs) as a function of resolving power  $\lambda/\Delta\lambda$  for an SNR scaling factor of 0.1, for SOL, VEG and DES albedo models (rows), and SZA values ranging from  $0^\circ$  to  $70^\circ$  (columns). Black lines with symbols give vertical sensitivities for CO<sub>2</sub>M (circles), MicroCarb (triangles) and NanoCarb (squares).



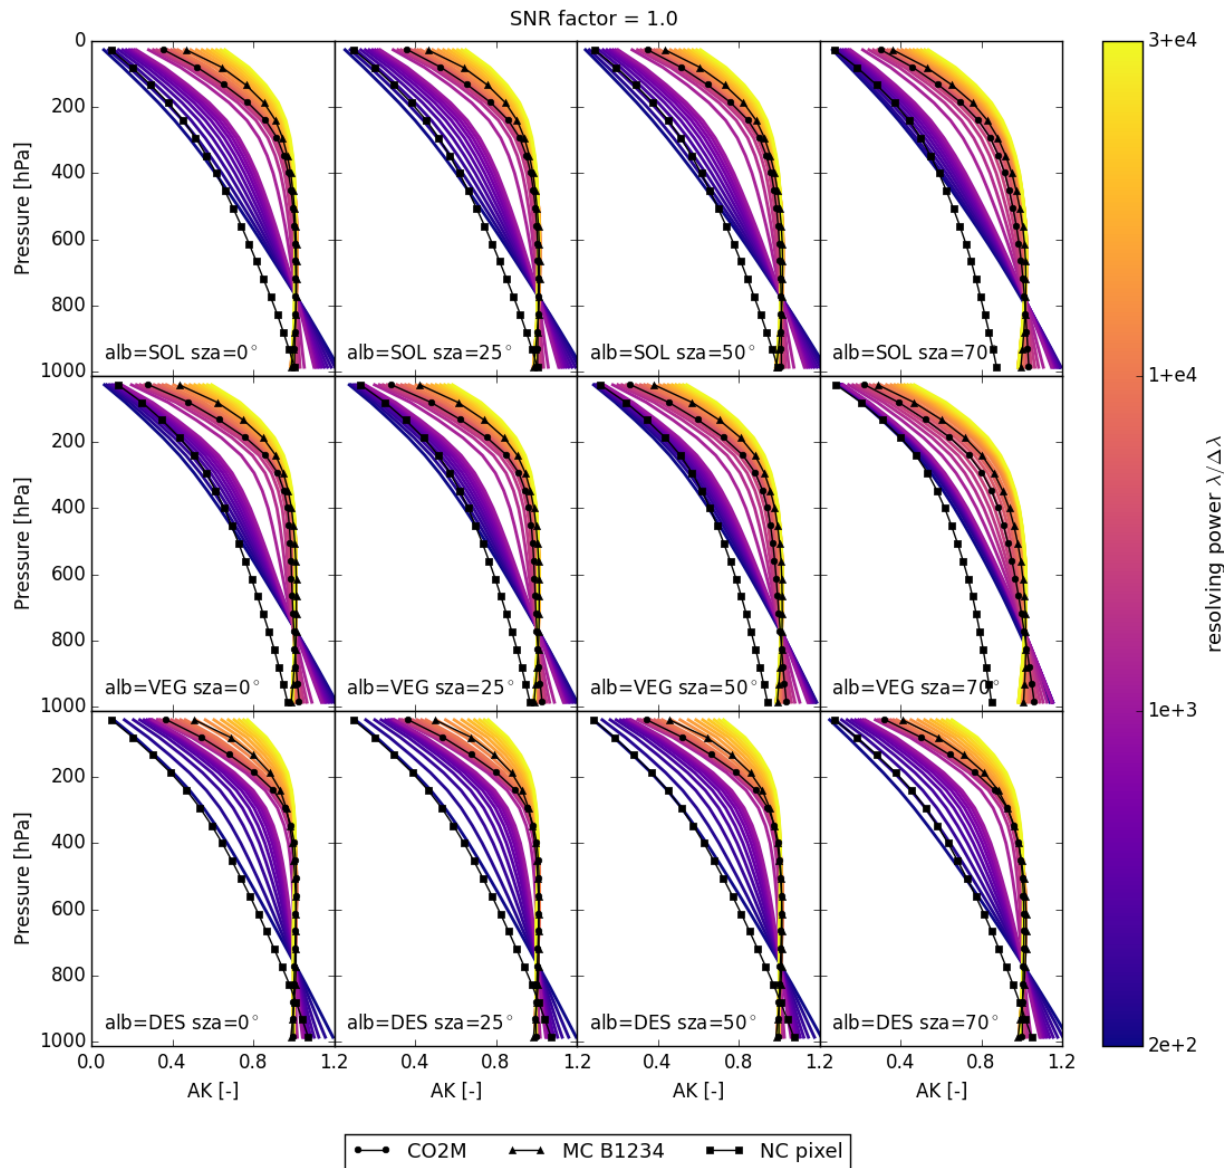

Figure S5. Vertical sensitivities (AKs) as a function of resolving power  $\lambda/\Delta\lambda$  for an SNR scaling factor of 1, for SOL, VEG and DES albedo models (rows), and SZA values ranging from 0° to 70° (columns). Black lines with symbols give vertical sensitivities for CO<sub>2</sub>M (circles), MicroCarb (triangles) and NanoCarb (squares).

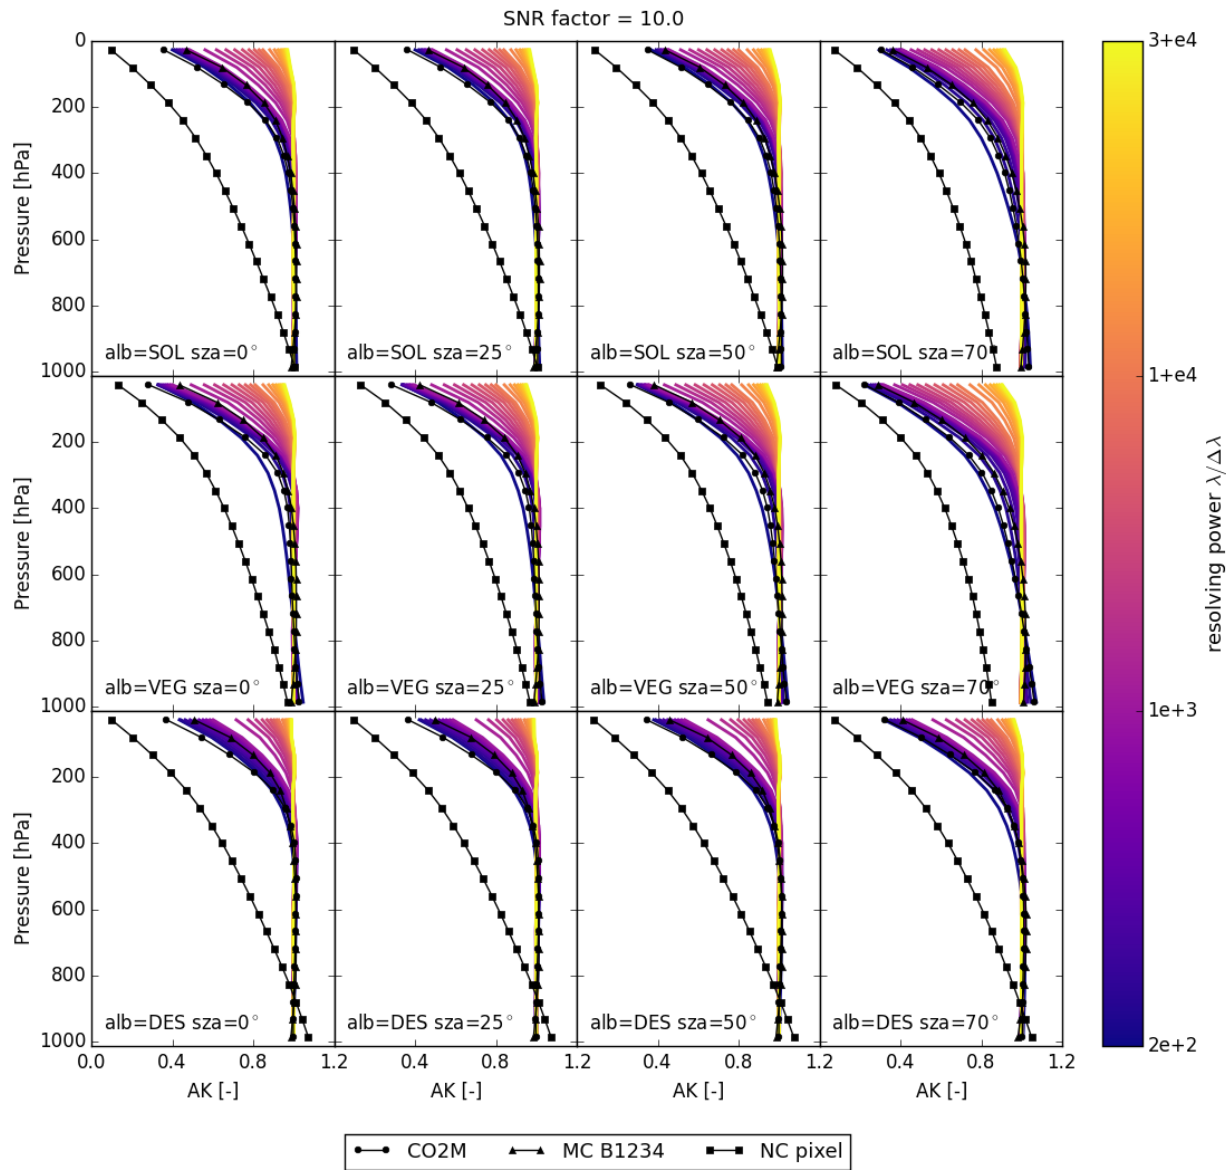

Figure S6. Vertical sensitivities (AKs) as a function of resolving power  $\lambda/\Delta\lambda$  for an SNR scaling factor of 10, for SOL, VEG and DES albedo models (rows), and SZA values ranging from  $0^\circ$  to  $70^\circ$  (columns). Black lines with symbols give vertical sensitivities for CO<sub>2</sub>M (circles), MicroCarb (triangles) and NanoCarb (squares).

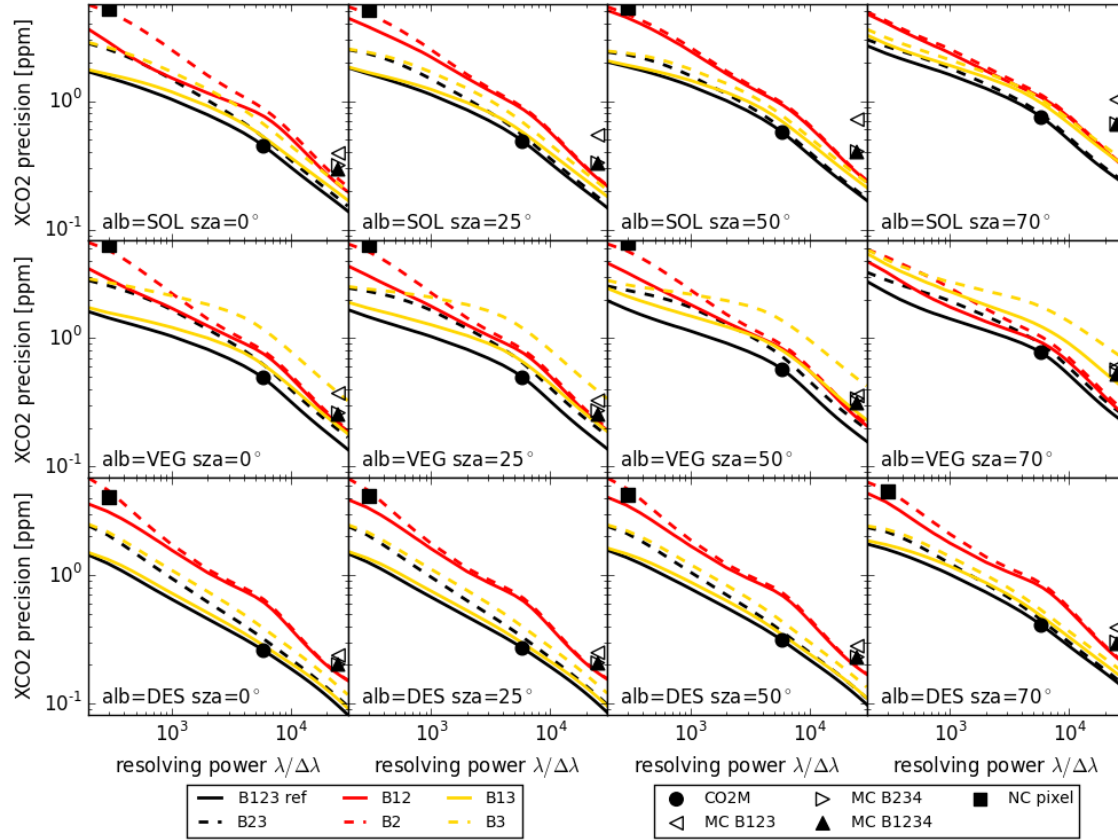

Figure S7.  $X_{CO_2}$  precision, or random error, for the fictitious CVAR instrument for resolving power  $\lambda/\Delta\lambda$  evolving from 200 to 30000 (horizontal axis), and for different spectral band selections: with and without  $O_2$  0.76  $\mu m$  band (B1, full and dashed-lines, respectively), with both  $CO_2$  1.6 and 2.05  $\mu m$  bands (B23, black), with only the 1.6  $\mu m$  band (B2, red) and with only the 2.05  $\mu m$  band (B3, yellow), for SOL, VEG and DES albedo models (rows), and SZA values ranging from  $0^\circ$  to  $70^\circ$  (columns). Symbols give the same quantities for NanoCarb (NC, squares), MicroCarb (MC, triangles) and  $CO_2M$  (circle).

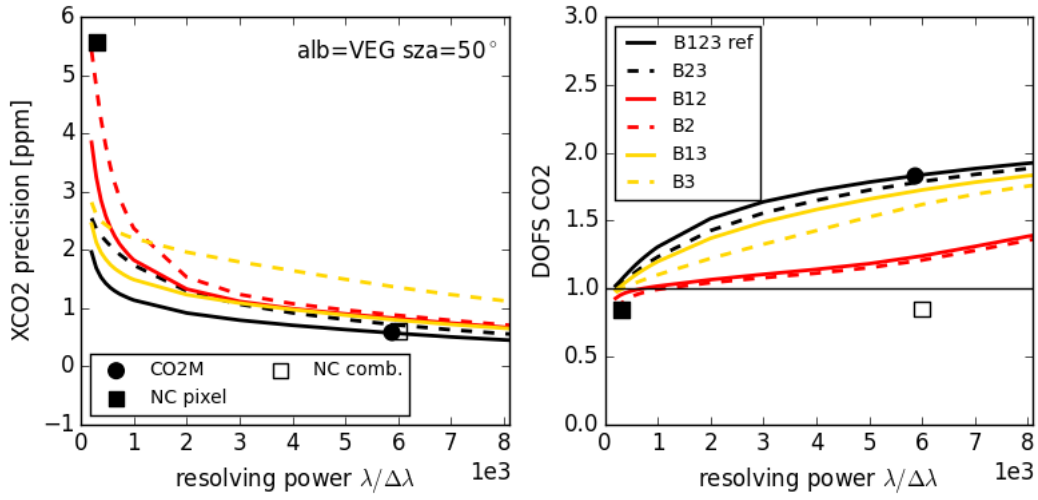

65

Figure S8. Same as Fig. 5, but in linear scale for the horizontal axis.

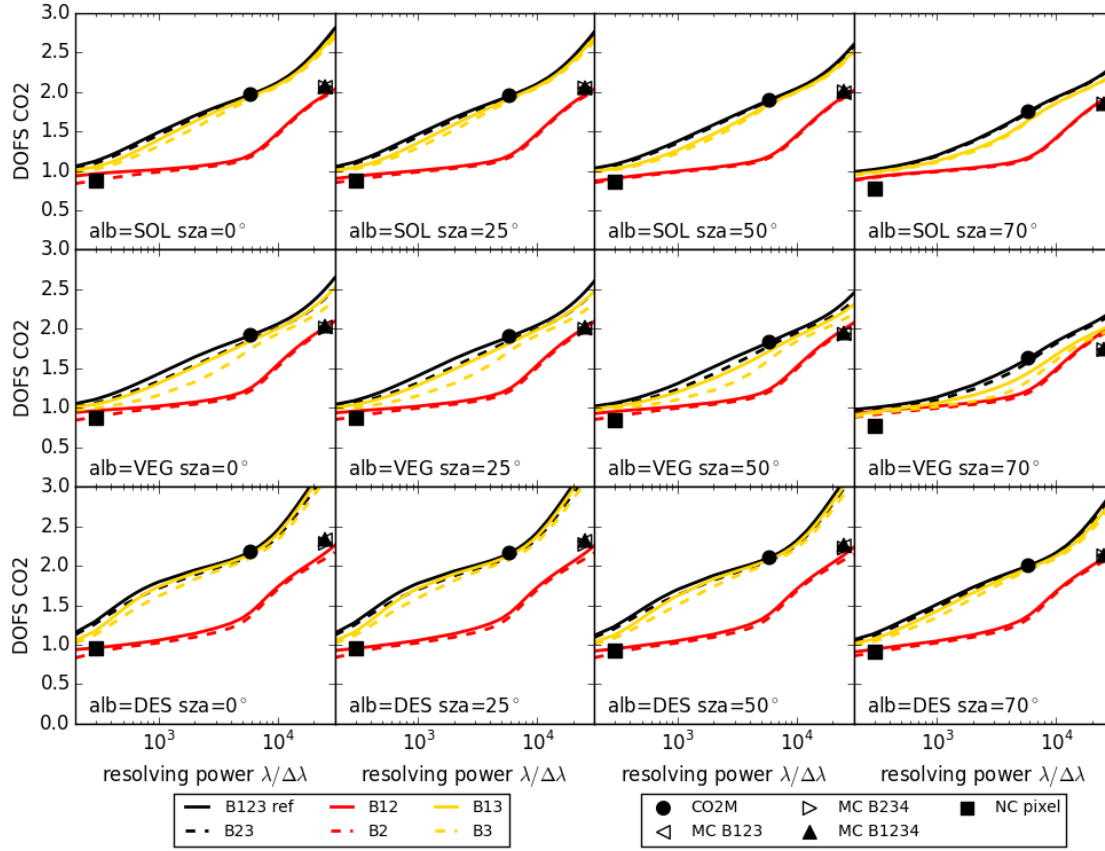

70 Figure S9. CO<sub>2</sub> degrees of freedom for the fictitious CVAR instrument, for resolving power  $\lambda/\Delta\lambda$  evolving from 200 to 30000 (horizontal axis), and for different spectral band selections: with and without O<sub>2</sub> 0.76  $\mu\text{m}$  band (B1, full and dashed-lines, respectively), with both CO<sub>2</sub> 1.6 and 2.05  $\mu\text{m}$  bands (B23, black), with only the 1.6  $\mu\text{m}$  band (B2, red) and with only the 2.05  $\mu\text{m}$  band (B3, yellow), for SOL, VEG and DES albedo models (rows), and SZA values ranging from 0° to 70° (columns). Symbols give the same quantities for NanoCarb (NC, squares), MicroCarb (MC, triangles) and CO<sub>2</sub>M (circle).

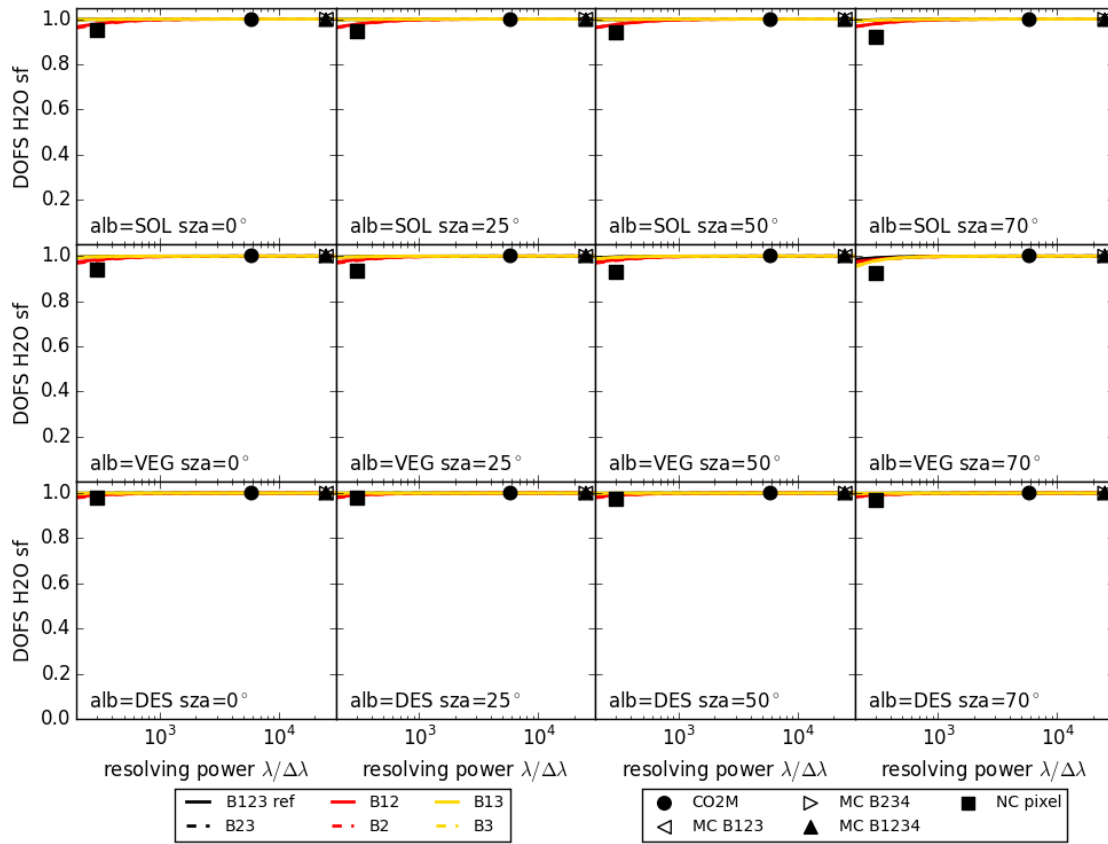

75

Figure S10. H<sub>2</sub>O scaling factor degrees of freedom for the fictitious CVAR instrument, for resolving power  $\lambda/\Delta\lambda$  evolving from 200 to 30000 (horizontal axis), and for different spectral band selections: with and without O<sub>2</sub> 0.76  $\mu\text{m}$  band (B1, full and dashed-lines, respectively), with both CO<sub>2</sub> 1.6 and 2.05  $\mu\text{m}$  bands (B23, black), with only the 1.6  $\mu\text{m}$  band (B2, red) and with only the 2.05  $\mu\text{m}$  band (B3, yellow), for SOL, VEG and DES albedo models (rows), and SZA values ranging from 0° to 70° (columns). Symbols give the same quantities for NanoCarb (NC, squares), MicroCarb (MC, triangles) and CO<sub>2</sub>M (circle).

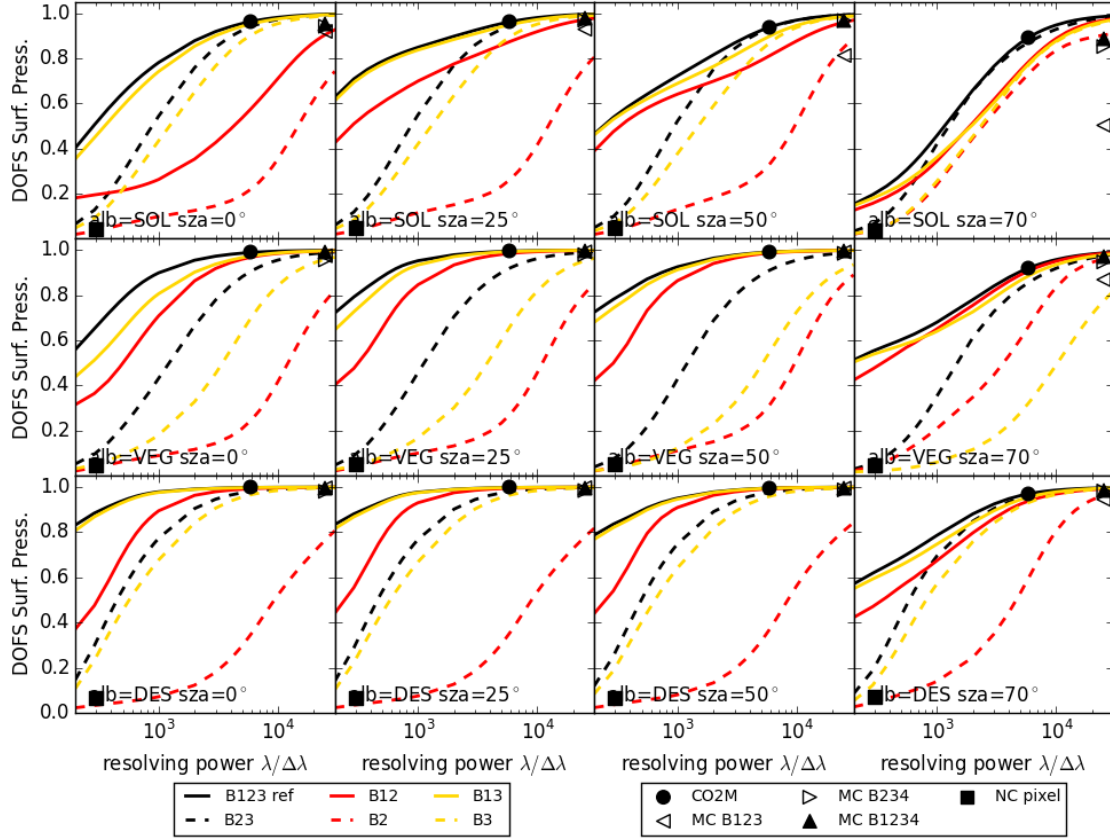

85 Figure S11. Surface Pressure degrees of freedom for the fictitious CVAR instrument, for resolving power  $\lambda/\Delta\lambda$  evolving from 200 to 30000 (horizontal axis), and for different spectral band selections: with and without O<sub>2</sub> 0.76  $\mu\text{m}$  band (B1, full and dashed-lines, respectively), with both CO<sub>2</sub> 1.6 and 2.05  $\mu\text{m}$  bands (B23, black), with only the 1.6  $\mu\text{m}$  band (B2, red) and with only the 2.05  $\mu\text{m}$  band (B3, yellow), for SOL, VEG and DES albedo models (rows), and SZA values ranging from 0° to 70° (columns). Symbols give the same quantities for NanoCarb (NC, squares), MicroCarb (MC, triangles) and CO<sub>2</sub>M (circle).

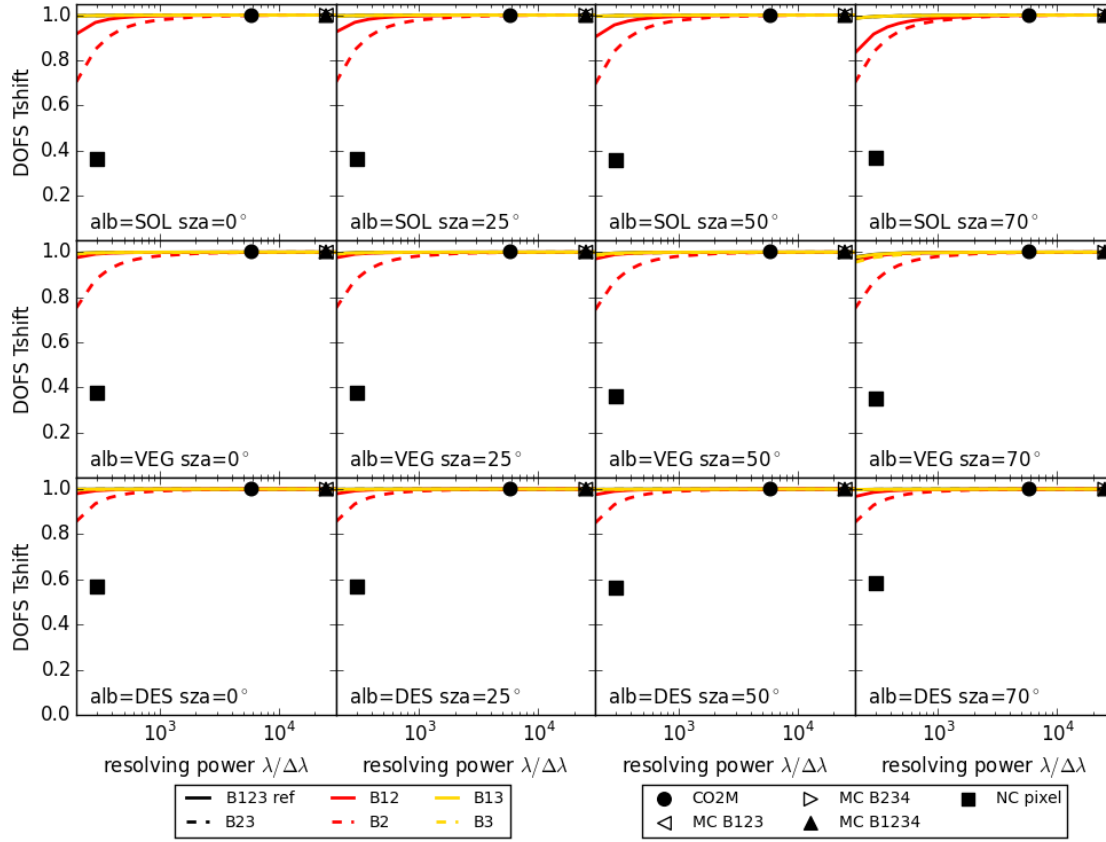

90

Figure S12. Temperature profile shift degrees of freedom for the fictitious CVAR instrument, for resolving power  $\lambda/\Delta\lambda$  evolving from 200 to 30000 (horizontal axis), and for different spectral band selections: with and without  $O_2$   $0.76 \mu\text{m}$  band (B1, full and dashed-lines, respectively), with both  $CO_2$   $1.6$  and  $2.05 \mu\text{m}$  bands (B23, black), with only the  $1.6 \mu\text{m}$  band (B2, red) and with only the  $2.05 \mu\text{m}$  band (B3, yellow), for SOL, VEG and DES albedo models (rows), and SZA values ranging from  $0^\circ$  to  $70^\circ$  (columns). Symbols give the same quantities for NanoCarb (NC, squares), MicroCarb (MC, triangles) and  $CO_2M$  (circle).



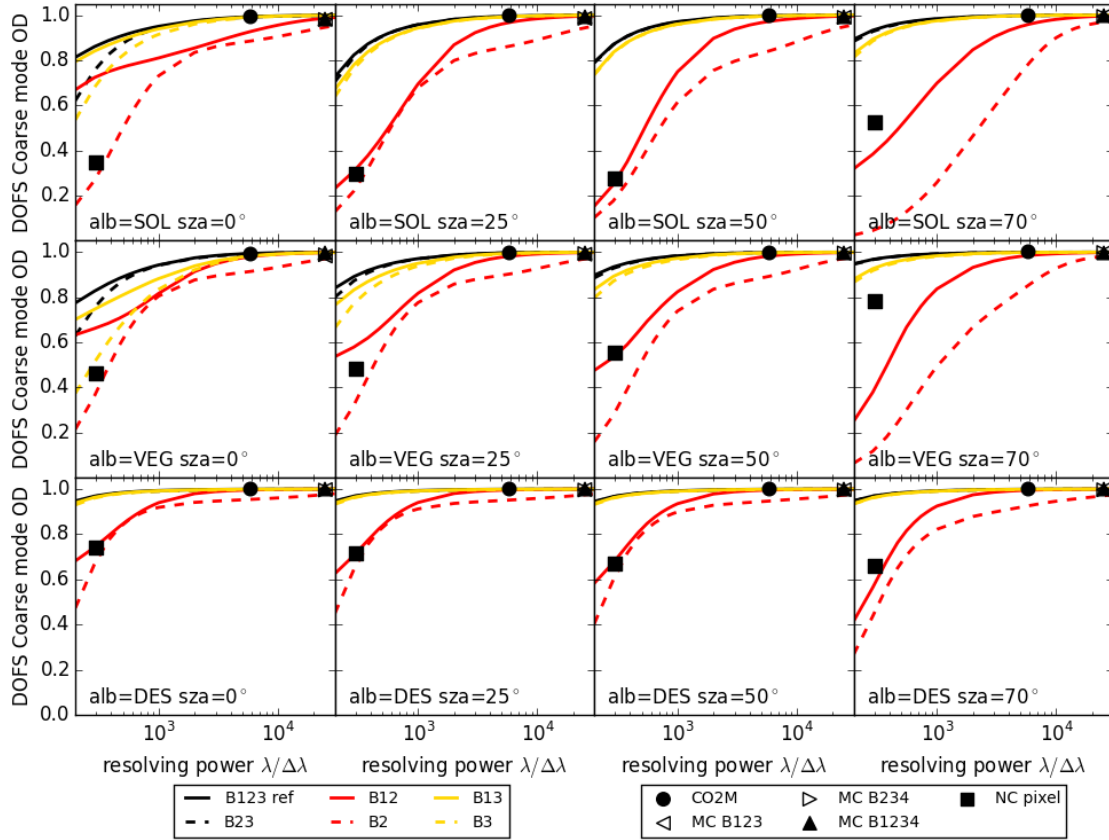

100 Figure S13. Coarse mode aerosol optical depth degrees of freedom for the fictitious CVAR instrument, for resolving power  $\lambda/\Delta\lambda$  evolving from 200 to 30000 (horizontal axis), and for different spectral band selections: with and without  $O_2$  0.76  $\mu\text{m}$  band (B1, full and dashed-lines, respectively), with both  $CO_2$  1.6 and 2.05  $\mu\text{m}$  bands (B23, black), with only the 1.6  $\mu\text{m}$  band (B2, red) and with only the 2.05  $\mu\text{m}$  band (B3, yellow), for SOL, VEG and DES albedo models (rows), and SZA values ranging from  $0^\circ$  to  $70^\circ$  (columns). Symbols give the same quantities for NanoCarb (NC, squares), MicroCarb (MC, triangles) and

105  $CO_2M$  (circle).

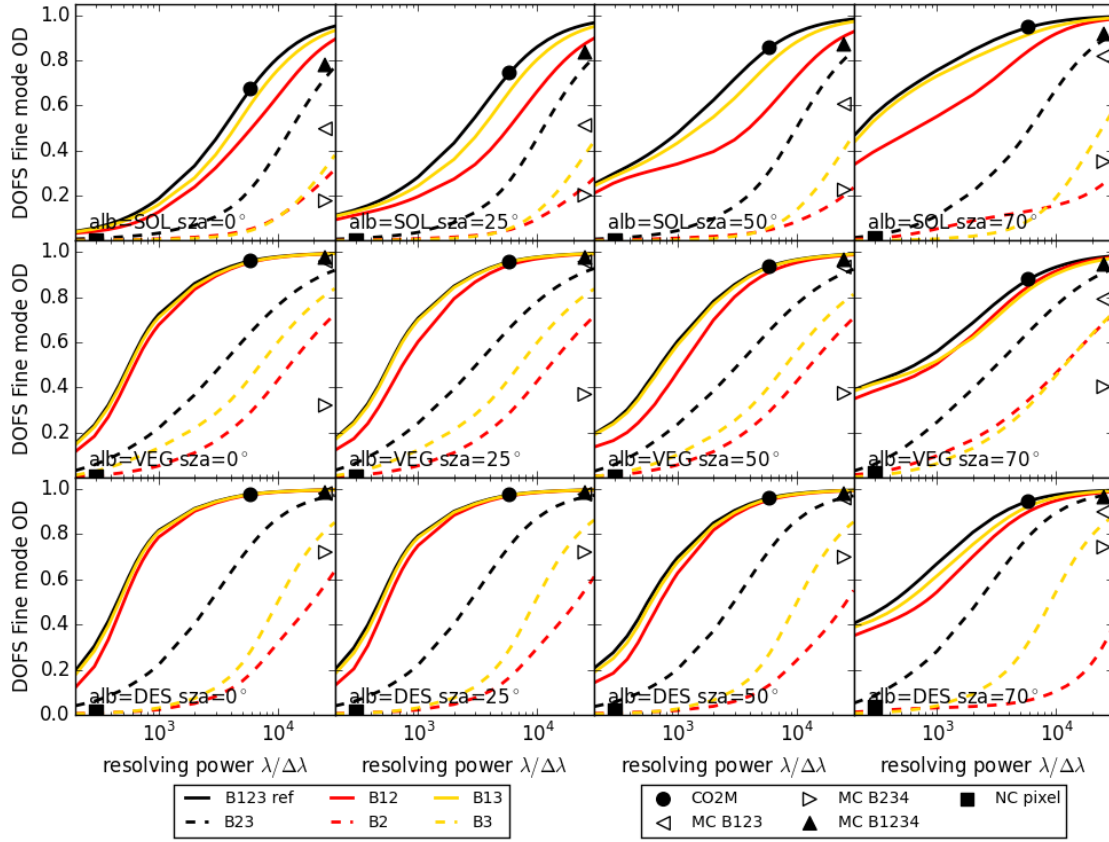

Figure S14. Fine mode aerosol optical depth degrees of freedom for the fictitious CVAR instrument, for resolving power  $\lambda/\Delta\lambda$  evolving from 200 to 30000 (horizontal axis), and for different spectral band selections: with and without O<sub>2</sub> 0.76  $\mu\text{m}$  band (B1, full and dashed-lines, respectively), with both CO<sub>2</sub> 1.6 and 2.05  $\mu\text{m}$  bands (B23, black), with only the 1.6  $\mu\text{m}$  band (B2, red) and with only the 2.05  $\mu\text{m}$  band (B3, yellow), for SOL, VEG and DES albedo models (rows), and SZA values ranging from 0° to 70° (columns). Symbols give the same quantities for NanoCarb (NC, squares), MicroCarb (MC, triangles) and CO<sub>2</sub>M (circle).

115

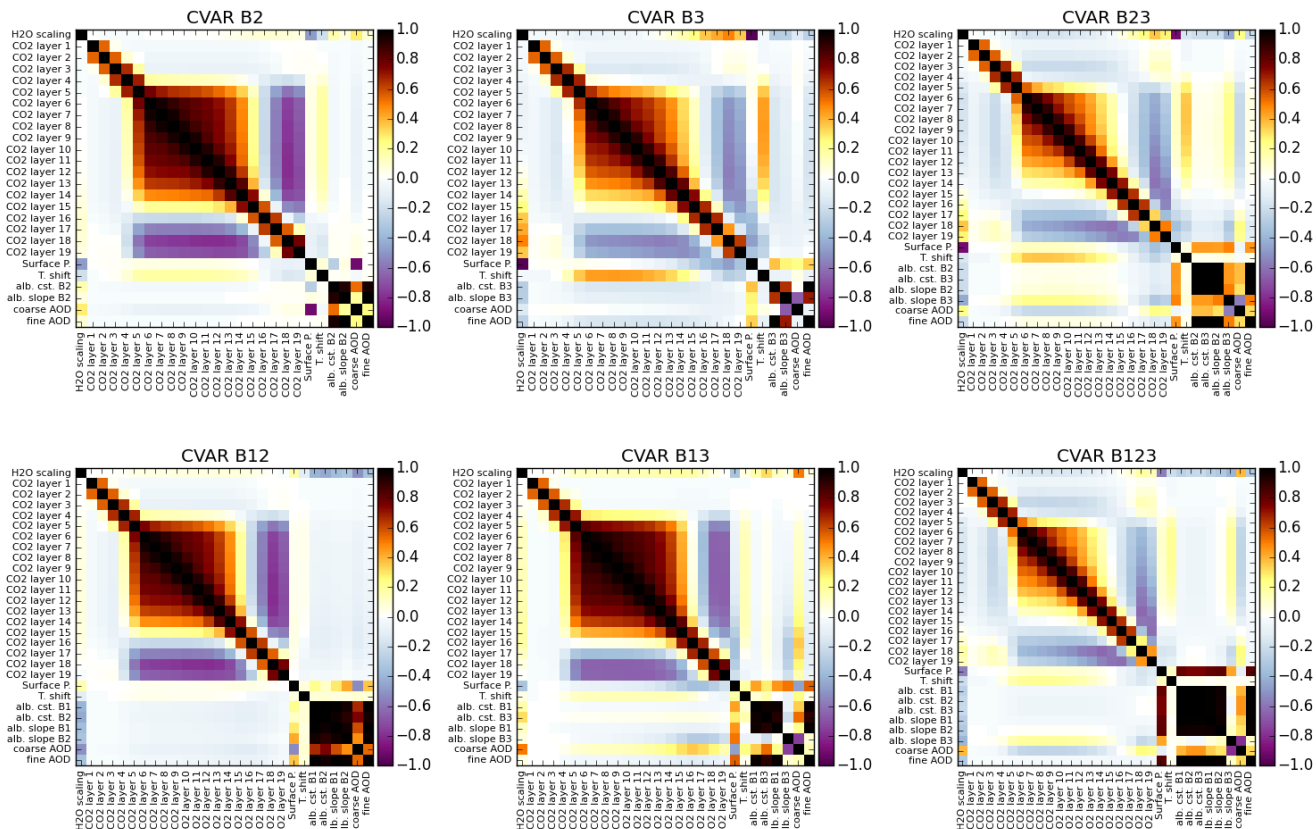

Figure S15. A posteriori correlation matrices for CVAR with a resolving power of 6000 for different spectral band combinations: without and with  $O_2$   $0.76 \mu\text{m}$  band (B1, top and bottom rows, respectively), with only the  $1.6 \mu\text{m}$  band (B2/B13, left), with only the  $2.05 \mu\text{m}$  band (B3/B13, center), with both  $CO_2$   $1.6$  and  $2.05 \mu\text{m}$  bands (B23/B123, right), for the VEG- $50^\circ$  situation.

120

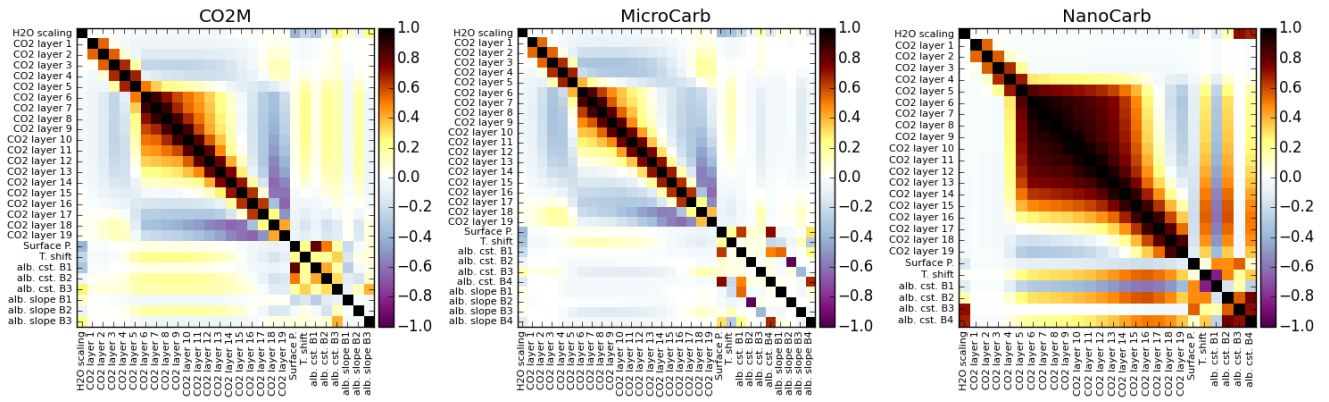

125 Figure S16. A posteriori correlation matrices for CO<sub>2</sub>M (left), MicroCarb (center) and NanoCarb (right), for the VEG-50° situation, when aerosol optical depth parameters are removed from the state vector.

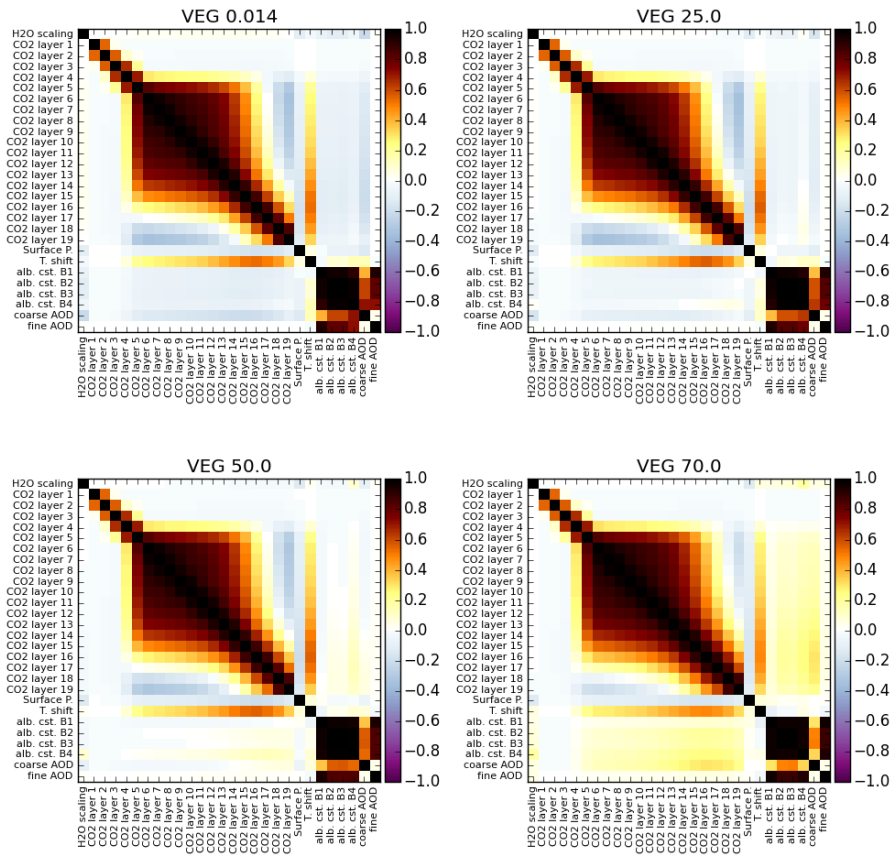

Figure S17. A posteriori correlation matrices for NanoCarb and different SZA values, for the VEG situations.

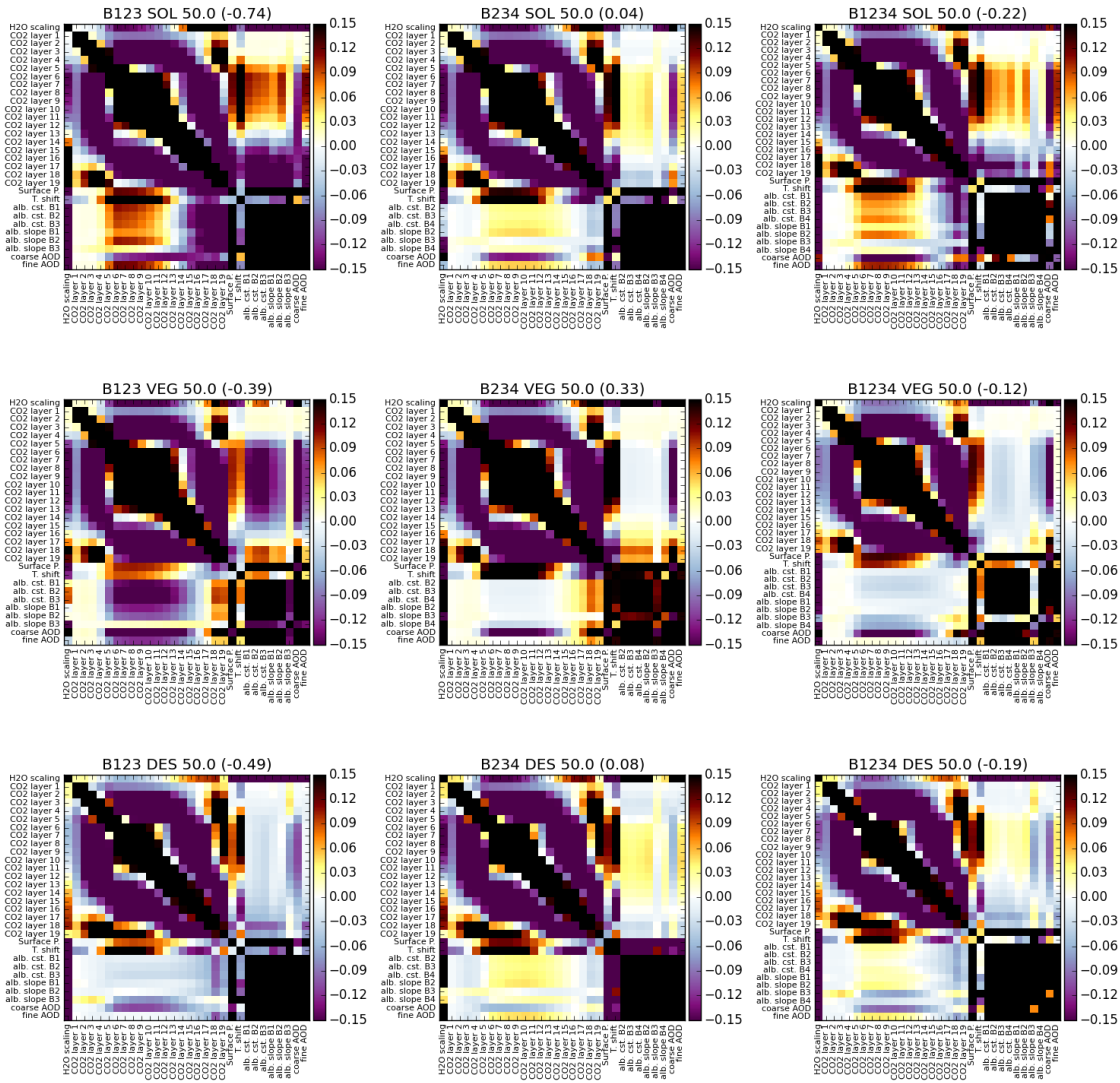

Figure S18. A posteriori correlation matrices for MicroCarb in three different band combination: B123 (left), B234 (center) and B1234 (left), for three different albedo models SOL (top), VEG (center) and DES (bottom), and for a SZA equal to 50°. The panel titles give in parenthesis the a posteriori Pearson correlation coefficient between  $X_{CO_2}$  and fine mode aerosol optical depth.

135
